1 **Epidemiological and clinical features of SARS-CoV-2 Infection in children during**  
2 **the outbreak of Omicron Variant in Shanghai, March 7-March 31, 2022**

3 Xiangshi Wang <sup>1,†</sup>, Hailing Chang <sup>1,†</sup>, He Tian <sup>1,†</sup>, Jingjing Li <sup>1</sup>, Zhongqiu Wei <sup>1</sup>, Yixue Wang  
4 <sup>2</sup>, Aimei Xia<sup>1</sup>, Yanling Ge<sup>1</sup>, Jiali Wang <sup>1</sup>, Gongbao Liu <sup>3</sup>, Jiehao Cai <sup>1</sup>, Jianshe Wang <sup>1</sup>, Qirong  
5 Zhu <sup>1</sup>, Yanfeng Zhu <sup>1,\*</sup>, Xiaowen Zhai <sup>4,\*</sup>, Mei Zeng<sup>1,\*</sup>

6  
7 <sup>1</sup> Department of infectious diseases, Children's Hospital of Fudan University, National  
8 Children's Medical Center

9 <sup>2</sup> Department of intensive care medicine, Children's Hospital of Fudan University, National  
10 Children's Medical Center

11 <sup>3</sup> Department of medical affairs, Children's Hospital of Fudan University, National Children's  
12 Medical Center

13 <sup>4</sup> Department of Hematology, Children's Hospital of Fudan University, National Children's  
14 Medical Center

15 † Xiangshi Wang, Hailing Chang and He Tian equally contributed to this paper.

16 \* Address for correspondence:

17 Yanfeng Zhu, MD, PhD, Department of Infectious Diseases, Children's Hospital of Fudan  
18 University, 399 Wanyuan Road, Shanghai 201102, China. E-mail: [smilingyf@sina.com](mailto:smilingyf@sina.com), Tel:  
19 86-021-64931132 (office), 86-13916913420 (mobile).

20 Xiaowen Zhai, MD, PhD, Department of Hematology, Children's Hospital of Fudan University,  
21 399 Wanyuan Road, Shanghai 201102, China. E-mail: [zhaixiaowendy@163.com](mailto:zhaixiaowendy@163.com), Tel: 86-021-  
22 64931902 (office), 86-18017590808(mobile).

23 Mei Zeng, MD, PhD, Department of Infectious Diseases, Children's Hospital of Fudan

**NOTE: This preprint reports new research that has not been certified by peer review and should not be used to guide clinical practice.**

24 University, 399 Wanyuan Road, Shanghai 201102, China. E-mail: zengmeigao@163.com, Tel:  
25 86-021-64931132 (office), 86-15000284050 (mobile).

26

## 27 **Abstract**

28 **Objectives:** To understand the epidemiological and clinical characteristics of pediatric SARS-CoV-2  
29 infection during the early stage of Omicron variant outbreak in Shanghai.

30 **Methods:** This study included local COVID-19 cases <18 years in Shanghai referred to the exclusively  
31 designated hospital by the end of March 2022 since emergence of Omicron epidemic. Clinical data,  
32 epidemiological exposure and COVID-19 vaccination status were collected. Relative risks (RR) were  
33 calculated to assess the effect of vaccination on symptomatic infection and febrile disease.

34 **Results:** A total of 376 pediatric cases of COVID-19 (median age:6.0±4.2 years) were referred to the  
35 designated hospital during the period of March 7-31, including 257 (68.4%) symptomatic cases and 119  
36 (31.6%) asymptomatic cases. Of the 307 (81.6%) children;3 years eligible for COVID-19 vaccination,  
37 110 (40.4%) received 2-dose vaccines and 16 (4.0%) received 1-dose vaccine. The median interval  
38 between 2-dose vaccination and infection was 3.5 (IQR: 3, 4.5) months (16 days-7 months). Two-dose  
39 COVID-19 vaccination reduced the risks of symptomatic infection and febrile disease by 35% (RR 0.65,  
40 95% CI:0.53-0.79) and 33% (RR 0.64, 95% CI: 0.51-0.81). Two hundred and sixteen (83.4%)  
41 symptomatic cases had fever (mean duration: 1.7±1.0.8 days), 104 (40.2%) had cough, 16.4% had  
42 transient leukopenia; 307 (81.6%) had an epidemiological exposure in household (69.1%), school (21.8%)  
43 and residential area (8.8%).

44 **Conclusion:** The surge of pediatric COVID-19 cases and multiple transmission model reflect wide  
45 dissemination of Omicron variant in the community. Asymptomatic infection is common among

46 Omicron-infected children. COVID-19 vaccination can offer protection against symptomatic infection

47 and febrile disease.

## 48 **Introduction**

49           The COVID-19 pandemic has caused devastation to the world's population, resulting in more than  
50 6 million deaths as of April 20, 2022. SARS-CoV-2 infection in most pediatric cases is mild as compared  
51 to adults and the direct effect on child health is limited [1]. However, the indirect impacts on child medical  
52 care, education and mental health are considerable owing to lockdown, disruption of essential health  
53 service delivery, prolonged school closure and isolation [2,3]. The continuous genetic evolution of  
54 SARS-CoV-2 virus results in the emergence of multiple new variants of concern (VOC), which are  
55 associated with enhanced transmissibility or increased virulence and immune escape [4]. The Omicron  
56 variant, which was detected in November 2021 and almost replaced Delta variant by the end of January  
57 2022, has led to the fifth global wave of COVID-19 epidemic [5]. The significant rise of pediatric  
58 infection was reported in the United States with children aged <18 years, representing 17.0%-19.0% of  
59 all cases during the Omicron period since late December 2021 [6,7].

60           Pediatric COVID-19 cases only accounted for a small proportion of infection in the early stages of  
61 the COVID-19 pandemic when many countries implemented non-pharmaceutical interventions and strict  
62 containment measures [8-12]. However, the incidence rate of COVID-19 in children showed a rising  
63 trend in the epidemic countries following suspension of lockdown and school reopening [12,13]. After  
64 the large-scale epidemic in early 2020, China entered a normalization stage of prevention and control,  
65 and massive COVID-19 vaccination campaign was launched nationwide in 2021. Inactivated SARS-  
66 CoV-2 vaccine BBIBP-CorV (by Sinopharm) and CoronaVac (by Sinovac) were approved for emergency  
67 use in children 3-17 years on June 2021 and COVID-19 vaccination program was initiated in pediatric  
68 population since late July 2021 across China. From May 2020, local pediatric COVID-19 infection linked  
69 to sporadic and cluster transmission were occasionally reported in China until the community outbreak

70 of Omicron variant appeared in Hong Kong Special Administrative Region since January 6, 2022 and  
71 subsequently in Shanghai since early March 2020 [14]. Omicron variant spread rapidly in Shanghai by  
72 the end of March and led to a surge of pediatric COVID-19 cases citywide. Here, we describe  
73 epidemiological and clinical characteristic of Omicron variant infections in Shanghainese children during  
74 the early stage of the outbreak.

75

## 76 **Subject and Method**

### 77 **Subject**

78 In this study, we included local COVID-19 cases <18 years of age who were notified in Shanghai  
79 and admitted to the exclusively designated hospital in Shanghai by the end of March 2022. Prior to 28  
80 March, all pediatric COVID-19 cases notified in Shanghai were referred to the designated hospital for  
81 concentrating management and isolation. Since 28 March when a large number of cases were confirmed  
82 by massive screening test, most of asymptomatic and mild pediatric cases aged 5-17 years were almost  
83 sent to Fangcang shelter hospitals. All confirmed cases irrespective of symptoms are required for in-  
84 hospital isolation and are discharged if the cycle threshold (Ct) value for the viral nucleic acid is great  
85 than 35 on PCR test for the two consecutive respiratory samples taken 24-hour apart [15].

### 86 **Case definition and classification**

87 All COVID19 cases were laboratory-confirmed by the Shanghai CDC reference laboratory using  
88 real-time RT-PCR commercial kit. The Ct value <40 was defined as a positive nucleic acid amplification  
89 test. COVID-19 cases were classified as asymptomatic and symptomatic cases. Symptomatic cases were  
90 classified as mild, moderate and severe cases. An asymptomatic case is defined as a person with a positive  
91 nucleic acid test but without any clinical symptom of COVID-19. A confirmed symptomatic case is

92 defined as a person presenting clinical signs and symptoms of COVID-19. COVID-19 disease severity  
93 classification is based on the WHO guidance [16]. Pneumonia was diagnosed based on clinical signs  
94 (fever and/or cough accompanying with one of the following signs: moist rales on auscultation, difficulty  
95 breathing/dyspnoea, fast breathing, chest indrawing), radiological findings compatible with pneumonia.

## 96 **Data collection**

97 Data were collected via a face-to-face interview with parents or teenagers and electronic medical  
98 chart, including: demographic information, epidemiological exposure setting, COVID-19 vaccination  
99 status on dose and date, clinical symptoms, laboratory findings and chest imaging if examined, treatment  
100 and outcome. Informed consent from parents was not required by the ethics committee because all data  
101 were de-identified and not involved in personal privacy.

## 102 **Statistical analysis**

103 Data was entered into Excel version 2016 (Microsoft, Redmond, Washington) for analysis and the  
104 statistical analysis was performed using SPSS (IBM Statistic 23.0). Categorical variables are described  
105 as absolute numbers and percentage. Continuous variables with normal distribution are expressed as  
106 mean  $\pm$  standard deviation. Median (25% to 75% interquartile range (IQR) are used when the frequency  
107 distributions were skewed. Differences between groups are compared using Mann-Whitney *U*-test and  
108 Student's *t*-test as appropriate. A difference with  $P < 0.05$  is considered to be statistically significant.  
109 Relative risks (RR) were calculated using proportion of symptomatic infection and febrile cases by  
110 vaccination status, with the referent group being  $\geq 2$ -dose vaccinees.

## 111 **Results**

### 112 **Demographic characteristics**

113 The first local pediatric case was notified on March 2022 and increased remarkably from 14 March  
114 onwards (as shown in Figure 1). As of 31 March, a total of 376 pediatric cases of COVID-19 were

115 referred to the exclusively designated hospital. The ratio of male-to-female was 1.1 (206/170). The 376  
116 cases were aged 11 days-17 years with the median age of 5.0 years (IQR: 2, 9) and the mean age of  
117  $6.0 \pm 4.2$  years: 28 (7.4%) cases in age group <1 year, 76 (20.2%) cases in age group 1-2 years, 94 (25.0%)  
118 cases in age group 3-5 years, 134 (35.6%) cases in age group 6-11 years, and 44 (11.7%) cases in age  
119 group  $\geq 12$  years.

## 120 **Epidemiological exposure**

121 Three hundred and seven (81.6%) cases had a clear history of exposure, of whom, 213 (69.1%)  
122 had a close contact with confirmed adult cases in household, 67 (21.8%) had a clear contact with  
123 confirmed child cases in school, and 27 (8.8%) had an epidemiological linkage to residential area  
124 where cluster cases of COVID-19 were reported. As shown in Figure 2, the first child case acquired  
125 infection in family, soon after, child cases linked to possible community transmission were found, who  
126 had no clear exposure.

## 127 **Vaccination status**

128 A total of 126 had received at least one dose of an inactivated COVID-19 vaccine, accounting for  
129 33.5% of the total 376 pediatric cases and 46.3% of the 272 pediatric cases aged  $\geq 3$  years eligible for  
130 COVID-19 vaccination in China. Of the 272 vaccine-eligible children, 146 (53.6%) were unvaccinated,  
131 110 (40.4%) had received 2 doses and 16 (4.0%) had received 1 dose. Among the 94 preschool children  
132 aged 3-5 years, the proportions of 1 dose and 2 doses of COVID-19 vaccination were 3.2% (3/94) and  
133 5.3% (5/94), respectively. Among the 178 school children aged 6-17 years, the proportions of 1 dose and  
134 2 doses of COVID-19 vaccination were 7.3% (13/174) and 59.0% (105/174), respectively. Overall, the  
135 interval between vaccination and breakthrough infection ranged from 16 days to 7 months (median: 3.5  
136 (IQR: 3, 4.5) months).

137 As shown in table 1, 2-dose COVID-19 vaccination reduced the risk of symptomatic infection and  
138 febrile disease by 35% (0.65, 95% CI: 0.53-0.79) and by 36% (RR 0.64, 95% CI: 0.51-0.81) in children  
139 0-17 years, by 29% (RR 0.71, 95% CI: 0.57-0.88) and 29% (RR 0.71, 95% CI: 0.55-0.92) in children 3-  
140 17 years eligible for COVID-19 vaccine. However, one-dose vaccination could not significantly decrease  
141 the relative risks of symptomatic infection and febrile disease.

#### 142 **Clinical manifestation and course**

143 Of the 376 cases, 257 (68.4%) presented symptoms and 119 (31.6%) had no symptoms before and  
144 duration hospitalization. Of the 257 symptomatic cases, 216 (83.4%) experienced fever (axillary  
145 temperature  $>37.5^{\circ}\text{C}$ ) with a mean fever spike of  $38.9 \pm 0.6^{\circ}\text{C}$  (range:  $37.6-41^{\circ}\text{C}$ ) and a mean fever  
146 duration of  $1.7 \pm 1.0.8$  days (range: 0.5-4 days), 104 (40.2%) presented cough, 28 (10.8%) self-reported  
147 sore throat, 13 (5.0%) self-reported stuffy nose, 6 (2.3%) had runny nose, 11 (4.2%) had nausea or  
148 vomiting or diarrhea, 2 (0.8%) self-reported transient loss of taste and smell. No severe case was  
149 diagnosed. Twenty five cases had chest CT performed due to fever  $>38.5^{\circ}\text{C}$  lasting for 3 days or cough  
150 worsening after admission or routine examination prior to the referral. The chest images showed patchy  
151 infiltrates or ground-glass opacity in 4 cases and one of them was right lung lobar pneumonia caused by  
152 *Mycoplasma pneumoniae*. Six (1.6%) cases had comorbidity including brain tumor, febrile seizure,  
153 psychomotor retardation, hemophilia, Henoch-Schonlein purpura, and cardiac arrhythmia in each.

154 As shown in table 2, 22.8% (57/250) of unvaccinated cases were asymptomatic while 50.0%  
155 (55/110) of 2-dose vaccinated cases were asymptomatic ( $P=0.000$ ); 65.2% (163/250) of unvaccinated  
156 cases were febrile while 41.8% (46/110) of 2-dose vaccinated cases were febrile ( $P=0.000$ ).  
157 Symptomatic infection was significantly frequently seen in the age group  $<3$  years than in the age group  
158 3-5 years ( $P=0.003$ ) and 6-17 years ( $P=0.000$ ). Fever was significantly frequently seen in the age group



159 3-5 years than in the age group <3 years (P=0.000) and 6-17 years (P=0.005).

160 Of the 225 case who had complete peripheral blood cell count tested, 37 (16.4%) had white blood  
161 cell (WBC) count  $<4 \times 10^9/L$ , 173 (76.9%) had WBC count  $4-9 \times 10^9/L$ , 13 (5.8%) had WBC count  $10-$   
162  $14 \times 10^9/L$  and 2 (7.1%) had WBC count  $\geq 15 \times 10^9/L$ . The WBC count ranged from  $1.9 \times 10^9/L$  to  
163  $15.5 \times 10^9/L$ . No thrombopenia was observed. Of the 187 cases who had peripheral blood C-reactive  
164 protein (CRP) tested, 178 (95.2%) had CRP  $<8$  mg/L, 8 (4.3%) had CRP  $>8$  mg/L (range: 8.8-35.8 mg/L)  
165 and 1 (0.5%) had CRP 56 mg/L who had co-infection with *mycoplasma pneumoniae* and developed  
166 typical lobar pneumonia in right lung. Of the 196 cases who had serum biochemical markers and 8 (4.1%)  
167 showed slightly elevated liver enzyme.

168 For symptomatic cases, Ibuprofen and or Chinese traditional medicines were prescribed depending  
169 on the personalized condition and medication compliance. Only one case who had a clear diagnosis of  
170 mycoplasma pneumonia was prescribed antibiotics. All cases were discharged when the Ct value of the  
171 nucleic acid of SARS-CoV-2 virus reached  $>35$ . The average duration of Ct value of the nucleic acid of  
172 SARS-CoV-2 virus  $>35$  since admission was  $11.7 \pm 3.7$  days (range: 3-25 days; symptomatic verse  
173 asymptomatic:  $11.7 \pm 3.6$  verse  $11.7 \pm 3.9$ , P=0.064).

174

## 175 **Discussion**

176 This study first presents the epidemiological and clinical profiles of Omicron variant infection in  
177 localized children during the early phase of outbreak in Shanghai. As of 31 March 2022, all pediatric  
178 COVID-19 cases were mild (68.4%) or asymptomatic (31.6%). However, a few of severe pediatric cases  
179 were reported during the period of COVID-19 outbreak in Wuhan in early 2020 [17]. Moreover, the  
180 proportion of asymptomatic cases was 2-time more than that seen in the Wuhan outbreak. We reason that

181 high coverage of COVID-19 vaccination among Shanghainese children is very likely to lower the risk of  
182 severe Omicron infection-associated disease. The mass COVID-19 vaccination roll-out among children  
183 3-17 years started between Mid-Aug 2021 and December 2021 in Shanghai and the estimated coverage  
184 rate of 2-dose COVID-19 vaccination among children 3-17 years has exceeded 70% by the end of  
185 March in 2022. In this case cohort 46.3% of children eligible for COVID-19 vaccination prior to 16 days  
186 to 7 months (median: 3.5months). Observational studies from some countries with the high levels of  
187 population immunity generated by natural infection or vaccine have shown receipt of two doses of  
188 COVID-19 vaccines and a booster dose can offer protection against symptomatic and severe Omicron  
189 infection in a short-term period of vaccination [4,18-22].

190 Current evidences consistently show a reduction in neutralizing antibody against Omicron in serum  
191 of convalescent or vaccinated individuals, resulting in Omicron's immune escape potential against  
192 vaccine- and infection-induced immunity [4,23]. However, two recent study based on real-world  
193 observation among children showed the modest effectiveness for COVID-19 vaccine against Omicron  
194 infection [25,26]. Based on our findings, receipt of 2-dose inactivated COVID-19 vaccine within 17 days  
195 to 7 months after fully primary vaccination potentially reduced the risk of symptomatic Omicron  
196 infection by 31% and febrile disease by 59% in children. We did not estimate vaccine protection against  
197 severe infection because no severe COVID-19 cases were diagnosed. There is also evidence of waning  
198 of vaccine effectiveness over time of the primary series against infection and symptomatic disease for  
199 the studied vaccines. However, the vaccine effectiveness against Omicron infection and disease can be  
200 restored and increase to > 40% to 80% within a short follow-up time after a third booster dose in studies  
201 from five countries (United Kingdom, Denmark, Canada, South Africa, USA) [4]. Ten cases of  
202 reinfection with Omicron variant were identified within 23 to 87 days of a previous Delta infection was

203 reported in the USA and most were pediatric cases [26]. Thus, eligible children and adolescents should  
204 remain up to date with recommended COVID-19 vaccination in response to Omicron outbreak. So far, a  
205 third booster dose of COVID-19 vaccine has been recommended for use in adults but not in children in  
206 China. In light of the field findings, a booster dose should also be recommended for eligible children 3-  
207 17 years.

208 We observed that school children aged 6-11 years comprised the most cases, followed by home-care  
209 children <2 years and preschool children 3-5 year. The distribution of age groups in the early stage of  
210 outbreak reflects the cluster transmission of COVID-19 centered in elementary school, kindergarten, and  
211 household. Of note, age group 12-17 years accounted for the smallest proportion of pediatric cases,  
212 among which, the high coverage rate of COVID-19 vaccination was as high as 95%. Based on the  
213 epidemiological investigation, more than 80% children had a clear history of exposure, mostly occurring  
214 in family (69.1%) and school (21.8%), occasionally in residential area (8.8%). The remaining 18.4% of  
215 children had no clear contact with confirmed cases, reflecting small-scale community transmission had  
216 already appeared prior to the large-scale outbreak since April. During the 2020 outbreak of COVID-19,  
217 80%-90% of confirmed child cases were family cluster cases and community transmission was unusual  
218 in China [17,27]. Rapid increases in pediatric COVID-19 cases and epidemiological unrelated cases also  
219 suggest the occurrence of high community transmission of Omicron variant in Shanghai since the early  
220 epidemic wave.

221 We observed most of localized pediatric cases (83.4%) of symptomatic Omicron infection  
222 presenting fever. However, fever is less commonly seen in pediatric COVID-19 cases reported in China  
223 (58%) and the USA (56%) during the first wave of pandemic in 2020 [10, 17]. Fever could be helpful for  
224 early recognition and diagnosis of COVID-19 because parents always worry about the febrile child and

225 visit hospital for seeking medical care. The febrile course of Omicron infection is brief with a mean fever  
226 duration of  $1.7\pm 1.0.8$  days, significantly shorter than fever duration seen influenza (4 days) [28]. The  
227 febrile duration is helpful to differentiate COVID-19 from influenza in children when the epidemics of  
228 COVID-19 and influenza overlap.

229 The potential role in transmission for most asymptomatic and mild child cases should not be  
230 neglected. A study showed that symptomatic and asymptomatic children can carry high quantities of live  
231 SARS-CoV-2, creating a potential reservoir for transmission [29]. Vaccinees with mild or asymptomatic  
232 Omicron infection shed infectious virus 6-9 days after onset or diagnosis, even after symptom resolution  
233 [30]. In fact, asymptomatic infection in children was underestimated in the early stage of outbreak  
234 because massive screening of COVID-19 cases had not been carried out before 28 March. After citywide  
235 large-scale screening, notifiable asymptomatic cases accounted for 90% more or less in April.  
236 Asymptomatic infection was much more common in vaccinated children than in unvaccinated children  
237 (50% vs 22.8%). Vaccination can offer protection against symptomatic infection and febrile disease, on  
238 the other hand, the role of asymptomatic children play in viral transmission is of attention during outbreak.  
239 High prevalence of asymptomatic infection is likely a major factor in the widespread of the Omicron  
240 variant among population.

241 In summary, COVID-19 is mild and subtle in Shanghainese children with the high level of vaccine-  
242 induced immunity during the early stage of Omicron outbreak. COVID-19 vaccination can offer partial  
243 protection against symptomatic COVID-19. Ongoing Omicron epidemic will increase the risk of  
244 exposure among children with underlying medical conditions, who are usually unvaccinated, therefore,  
245 severe COVID-19 infection is anticipated to be encountered in children. Non-pharmaceutical  
246 interventions in combination with vaccination strategies are critical to prevent infection and severe

247 disease and to mitigate the impact of COVID-19 in pediatric population.

#### 248 **Transparency declaration**

249 The authors have declared that there are no conflicts of interest in relation to this work. Disclosure forms  
250 provided by the authors are available as Supplementary material.

#### 251 *Funding*

252 This work was supported by the Science and Technology Commission of Shanghai Municipality (NO.  
253 20JC141020002), the Key Development Program of Children's Hospital of Fudan University  
254 (EK2022ZX05), the Three-Year Action Plan for Strengthening the Construction of Public Health System  
255 in Shanghai (2020-2022) (GWV-3.2), and the Key Discipline Construction Plan from Shanghai  
256 Municipal Health Commission (GWV-10.1-XK01). None of the funding organizations played any role  
257 in the trial design, data collection, analysis of results, or writing of the manuscript.

#### 258 **Author contributions**

259 Conceptualization: YZ, XZ, MZ; Methodology: XW, HC, HT, MZ; Software: XW, HC, HT; Validation:  
260 JC; Formal Analysis: XW, HC, HT, YZ, MZ; Investigation: JL, ZW, YW, AX, YG, JW, GL, JC; Writing-  
261 Original Draft: XW, HC, YZ, MZ; Writing-Review & Editing: XW, MZ; Visualization: JC, HC;  
262 Supervision: YZ, GL, JW, QZ, XZ, MZ; Project Administration: XZ; Funding acquisition: XZ, MZ. All  
263 authors approved the manuscript for publication.

264

#### 265 **Reference**

266 1. World Health Organization. COVID-19 disease in children and adolescents: Scientific brief, 29  
267 September 2021. Available from: [https://www.who.int/publications/i/item/WHO-2019-nCoV-Sci\\_Brief-](https://www.who.int/publications/i/item/WHO-2019-nCoV-Sci_Brief-Children_and_adolescents-2021.1)  
268 [Children\\_and\\_adolescents-2021.1](https://www.who.int/publications/i/item/WHO-2019-nCoV-Sci_Brief-Children_and_adolescents-2021.1). [Accessed 18 April 2022].

- 269 2. World Health Organization. Pulse survey on continuity of essential health services during the  
270 COVID-19 pandemic: interim report, 27 August 2020. Available from:  
271 [https://www.who.int/publications/i/item/WHO-2019-nCoV-EHS\\_continuity-survey-2020.1](https://www.who.int/publications/i/item/WHO-2019-nCoV-EHS_continuity-survey-2020.1). [Accessed  
272 18 April 2022].
- 273 3. Meherali S, Punjani N, Louie-Poon S, Abdul Rahim K, Das JK, Salam RA, et al. Mental Health of  
274 Children and Adolescents Amidst COVID-19 and Past Pandemics: A Rapid Systematic. Review Int J  
275 Environ Res Public Health 2021;18(7):3432. <https://doi.org/10.3390/ijerph18073432>
- 276 4. World Health Organization. Enhancing response to Omicron SARS-CoV-2 variant: Technical brief  
277 and priority actions for Member States. Available at:  
278 [https://www.who.int/publications/m/item/enhancing-readiness-for-omicron-\(b.1.1.529\)-technical-brief-](https://www.who.int/publications/m/item/enhancing-readiness-for-omicron-(b.1.1.529)-technical-brief-and-priority-actions-for-member-states)  
279 [and-priority-actions-for-member-states](https://www.who.int/publications/m/item/enhancing-readiness-for-omicron-(b.1.1.529)-technical-brief-and-priority-actions-for-member-states). [Accessed 22 April 2022].
- 280 5. World Health Organization. Weekly epidemiological update on COVID-19 - 1 March 2022. Available  
281 from: [https://www.who.int/publications/m/item/weekly-epidemiological-update-on-covid-19---1-](https://www.who.int/publications/m/item/weekly-epidemiological-update-on-covid-19---1-march-2022)  
282 [march-2022](https://www.who.int/publications/m/item/weekly-epidemiological-update-on-covid-19---1-march-2022). [Accessed 22 April 2022].
- 283 6. Iuliano AD, Brunkard JM, Boehmer TK, Peterson E, Adjei S, Binder AM, et al. Trends in Disease  
284 Severity and Health Care Utilization During the Early Omicron Variant Period Compared with Previous  
285 SARS-CoV-2 High Transmission Periods - United States, December 2020-January 2022. MMWR Morb  
286 Mortal Wkly Rep 2022;71(4):146-52. <https://doi.org/10.15585/mmwr.mm7104e4>
- 287 7. American Academy of Pediatrics, Children's Hospital Association. Children and COVID-19:  
288 State Data Report (Version3/31/22). Available from: [https://www.aap.org/en/pages/2019-novel-](https://www.aap.org/en/pages/2019-novel-coronavirus-covid-19-infections/children-and-covid-19-state-level-data-report/)  
289 [coronavirus-covid-19-infections/children-and-covid-19-state-level-data-report/](https://www.aap.org/en/pages/2019-novel-coronavirus-covid-19-infections/children-and-covid-19-state-level-data-report/) [Accessed 22 April  
290 2022].

- 291 8. World Health Organization (WHO). 2020. Report of the WHO-China joint mission on coronavirus  
292 disease 2019 (covid-19). Available from: [https://www.who.int/publications/i/item/report-of-the-who-](https://www.who.int/publications/i/item/report-of-the-who-china-joint-mission-on-coronavirus-disease-2019-(covid-19))  
293 [china-joint-mission-on-coronavirus-disease-2019-\(covid-19\)](https://www.who.int/publications/i/item/report-of-the-who-china-joint-mission-on-coronavirus-disease-2019-(covid-19)). [Accessed 21 April 2022].
- 294 9. Choi SH, Kim HW, Kang JM, Kim DH, Cho EY. 2020. Epidemiology and clinical features of  
295 coronavirus disease 2019 in children. *Clin Exp Pediatr* 63;(4):125-32.  
296 <https://doi.org/10.3345/cep.2020.00535>
- 297 10. CDC COVID-19 Response Team. Coronavirus Disease 2019 in Children - United States, February  
298 12-April 2, 2020. *MMWR Morb Mortal Wkly Rep* 2020;69(14):422-6.  
299 <https://doi.org/10.15585/mmwr.mm6914e4>
- 300 11. Ladhani SN, Amin-Chowdhury Z, Davies HG, Aiano F, Hayden I, Lacy J, et al. COVID-19 in  
301 children: analysis of the first pandemic peak in England. *Arch Dis Child* 2020;105(12):1180-5.  
302 <https://doi.org/10.1136/archdischild-2020-320042>
- 303 12. Malcangi G, Inchingolo AD, Inchingolo AM, Piras F, Settanni V, Garofoli G, et al. COVID-19  
304 Infection in Children and Infants: Current Status on Therapies and Vaccines. *Children (Basel)*.  
305 2022;9(2):249. <https://doi.org/10.3390/children9020249>
- 306 13. Singhal T. The Emergence of Omicron: Challenging Times Are Here Again! *Indian J Pediatr*  
307 2022;89(5):490-6. <https://doi.org/10.1007/s12098-022-04077-4>
- 308 14. Smith DJ, Hakim AJ, Leung GM, Xu WB, Schluter WW, Novak RT, et al. Preplanned Studies:  
309 COVID-19 Mortality and Vaccine Coverage - Hong Kong Special Administrative Region, China, January  
310 6, 2022–March 21, 2022. *China CDC Weekly* 2022; 4(14): 288-92.  
311 <https://doi.org/10.46234/ccdcw2022.071>
- 312 15. National Health Commission of The People's Republic of China. Interim protocol of diagnosis and

- 313 treatment of 2019 novel coronavirus-associated pneumonia (the ninth version). Available from:  
314 [http://www.gov.cn/zhengce/zhengceku/2022-03/15/content\\_5679257.htm](http://www.gov.cn/zhengce/zhengceku/2022-03/15/content_5679257.htm). [Accessed 22 April 2022].
- 315 16. World Health Organization. Living guidance for clinical management of COVID-19. Available at:  
316 <https://www.who.int/publications/i/item/WHO-2019-nCoV-clinical-2021-2>. [Accessed 22 April 2022].
- 317 17. Lu X, Zhang L, Du H, Zhang J, Li YY, Qu J, et al. Chinese Pediatric Novel Coronavirus Study  
318 Team. SARS-CoV-2 Infection in Children. *N Engl J Med* 2020;382(17):1663-5.  
319 <https://doi.org/10.1056/NEJMc2005073>
- 320 18. Cloete J, Kruger A, Masha M, du Plessis NM, Mawela D, Tshukudu M, et al. Paediatric  
321 hospitalisations due to COVID-19 during the first SARS-CoV-2 omicron (B.1.1.529) variant wave  
322 in South Africa: a multicentre observational study. *Lancet Child Adolesc Health* 2022;6(5):294-302.  
323 [https://doi.org/10.1016/S2352-4642\(22\)00027-X](https://doi.org/10.1016/S2352-4642(22)00027-X)
- 324 19. Wang L, Berger NA, Kaelber DC, Davis PB, Volkow ND, Xu R. Incidence Rates and Clinical  
325 Outcomes of SARS-CoV-2 Infection with the Omicron and Delta Variants in Children Younger than  
326 5 Years in the US. *JAMA Pediatr* 2022;1:e220945.  
327 <https://doi.org/10.1001/jamapediatrics.2022.0945>
- 328 20. Iuliano AD, Brunkard JM, Boehmer TK, Peterson E, Adjei S, Binder AM, et al. Trends in Disease  
329 Severity and Health Care Utilization During the Early Omicron Variant Period Compared with Previous  
330 SARS-CoV-2 High Transmission Periods - United States, December 2020-January 2022. *MMWR Morb*  
331 *Mortal Wkly Rep* 2022;71(4):146-52. <https://doi.org/10.15585/mmwr.mm7104e4>
- 332 21. Menni C, Valdes AM, Polidori L, Antonelli M, Penamakuri S, Nogal A, et al. Symptom  
333 prevalence, duration, and risk of hospital admission in individuals infected with SARS-CoV-2  
334 during periods of omicron and delta variant dominance: a prospective observational study from the



- 335 ZOE COVID Study. *Lancet* 2022;7:S0140-6736(22)00327-0. <https://doi.org/10.1016/S0140->
- 336 6736(22)00327-0
- 337 22. Wolter N, Jassat W, Walaza S, Welch R, Moultrie H, Groome M, et al. Early assessment of the
- 338 clinical severity of the SARS-CoV-2 omicron variant in South Africa: a data linkage study. *Lancet*
- 339 2022;399(10323):437-46. [https://doi.org/10.1016/S0140-6736\(22\)00017-4](https://doi.org/10.1016/S0140-6736(22)00017-4)
- 340 23. Peiris M, Cheng S, Mok CKP, Leung Y, Ng S, Chan K, et al. Neutralizing antibody titres to SARS-
- 341 CoV-2 Omicron variant and wild-type virus in those with past infection or vaccinated or boosted with
- 342 mRNA BNT162b2 or inactivated CoronaVac vaccines. *Res Sq [Preprint]* 2022;rs.3.rs-1207071.
- 343 <https://doi.org/10.21203/rs.3.rs-1207071/v1>
- 344 24. Fowlkes AL, Yoon SK, Lutrick K, Gwynn L, Burns J, Grant L, et al. Effectiveness of 2-Dose
- 345 BNT162b2 (Pfizer BioNTech) mRNA Vaccine in Preventing SARS-CoV-2 Infection Among
- 346 Children Aged 5-11 Years and Adolescents Aged 12-15 Years - PROTECT Cohort, July 2021-
- 347 February 2022. *MMWR Morb Mortal Wkly Rep.* 2022 Mar 18;71(11):422-8.
- 348 <https://doi.org/10.15585/mmwr.mm7111e1>
- 349 25. Araos R, Jara A, Undurraga E, Zubizarreta J, Gonzalez C, Acevedo J, et al. Effectiveness of
- 350 CoronaVac in children 3 to 5 years during the omicron SARS-CoV-2 outbreak. *Research Square*
- 351 [Preprint]. <https://doi.org/10.21203/rs.3.rs-1440357/v1>
- 352 26. Roskosky M, Borah BF, DeJonge PM, Donovan CV, Blevins LZ, Lafferty AG, et al. Notes
- 353 from the Field: SARS-CoV-2 Omicron Variant Infection in 10 Persons Within 90 Days of Previous
- 354 SARS-CoV-2 Delta Variant Infection - Four States, October 2021-January 2022. *MMWR Morb*
- 355 *Mortal Wkly Rep* 2022;71(14):524-6. <https://doi.org/10.15585/mmwr.mm7114a2>
- 356 27. Jiehao C, Jin X, Daojiong L, Zhi Y, Lei X, Zhenghai Q, et al. A Case Series of Children With

- 357 2019 Novel Coronavirus Infection: Clinical and Epidemiological Features. *Clin Infect Dis*  
358 2020;71(6):1547-51. <https://doi.org/10.1093/cid/ciaa198>
- 359 28. Wang X, Cai J, Yao W, Zhu Q, Zeng M. Socio-economic impact of influenza in children:a  
360 single-centered hospital study in Shanghai. *Chin J Epidemiol* 2015;36(1):27-30.
- 361 29. Yonker LM, Boucau J, Regan J, Choudhary MC, Burns MD, Young N, et al. Virologic Features of  
362 Severe Acute Respiratory Syndrome Coronavirus 2 Infection in Children. *J Infect Dis*  
363 2021;224(11):1821-9. <https://doi.org/10.1093/infdis/jiab509>
- 364 30. Takahashi K, Ishikane M, Ujiie M, Iwamoto N, Okumura N, Sato T, et al. Duration of  
365 Infectious Virus Shedding by SARS-CoV-2 Omicron Variant-Infected Vaccinees. *Emerg Infect Dis*  
366 2022;28(5):998-1001. <https://doi.org/10.3201/eid2805.220197>  
367

368 Table 1. Clinical characteristics of SARS-CoV-2 infection according to COVID-19 vaccination  
 369 status

| Vaccination status by age group (years) | Symptomatic case, n (%) | Relative risk (95% CI) | Febrile cases n (%) | Relative risk (95% CI) |
|-----------------------------------------|-------------------------|------------------------|---------------------|------------------------|
| 0-17 (n=376)                            |                         |                        |                     |                        |
| unvaccinated (n=250)                    | 193 (77.2%)             | ref                    | 163 (65.2%)         | ref                    |
| 1 dose (n=16)                           | 9 (56.3%)               | 0.73 (0.47-1.13)       | 7 (43.8%)           | 0.67 (0.38-1.18)       |
| 2 doses (n=110)                         | 55 (50.0%)              | 0.65 (0.53-0.79)       | 46 (41.8%)          | 0.64 (0.51-0.81)       |
| 3-17 (n=272)                            |                         |                        |                     |                        |
| unvaccinated (n=146)                    | 103 (70.5%)             | ref                    | 86 (58.9%)          | ref                    |
| 1 dose (n=16)                           | 9 (56.3%)               | 0.80 (0.51-1.24)       | 7 (43.8%)           | 0.74 (0.42-1.32)       |
| 2 doses (n=110)                         | 55 (50.0%)              | 0.71(0.57-0.88)        | 46 (41.8%)          | 0.71 (0.55-0.92)       |

370 **Abbreviation:** ref = referent group.

371

372

Table 2. Clinical characteristics of SARS-CoV-2 virus infection by age group

| Clinical characteristics       | Total<br>(n=376) | Age group (years) |               |                | <i>P</i> value | Vaccination status |                    | <i>P</i> value |
|--------------------------------|------------------|-------------------|---------------|----------------|----------------|--------------------|--------------------|----------------|
|                                |                  | <3                | 3-5           | 6-17           |                | Unvaccinated       | 2-dose vaccination |                |
|                                |                  | (n=104)           | (n=94)        | (n=178)        |                | (n=250)            | (n=110)            |                |
| Asymptomatic cases, n (%)      | 119<br>(31.6%)   | 14<br>(13.5%)     | 29<br>(30.9%) | 76<br>(42.7%)  | 0              | 57 (22.8%)         | 55 (50.0%)         | 0              |
| Symptomatic cases, n (%)       | 257<br>(68.4%)   | 90<br>(86.5%)     | 65<br>(69.1%) | 102<br>(57.3%) | 0              | 193 (77.2%)        | 55 (50.0%)         | 0              |
| Febrile cases, n (%)           | 216<br>(57.4%)   | 44<br>(42.3%)     | 59<br>(62.8%) | 80<br>(44.9%)  | 0.006          | 163 (65.2%)        | 46 (41.8%)         | 0              |
| Fever spike (°C), mean±SD      | 38.9±0.6         | 39.0±0.7          | 39.0±0.6      | 38.8±0.6       | 0.064          | 38.9±0.6           | 38.8±0.7           | 0.27           |
| Fever duration (days), mean±SD | 1.7±0.8          | 1.7±0.9           | 1.6±0.6       | 1.8±0.8        | 0.45           | 1.6±0.8            | 1.9±0.9            | 0.19           |

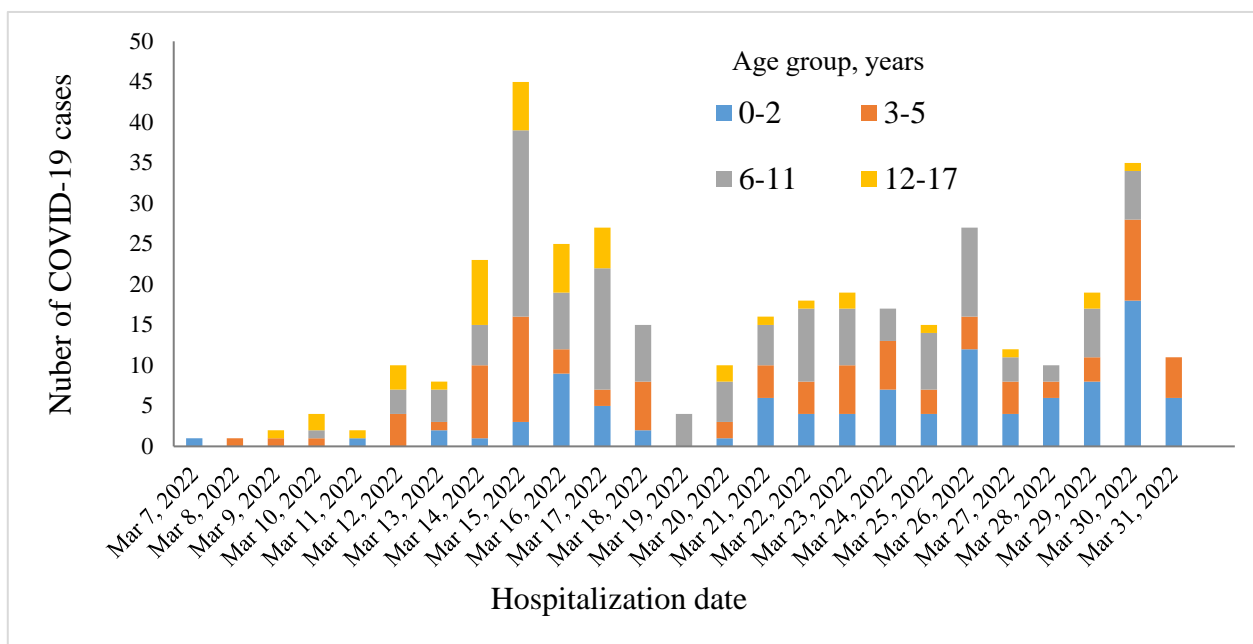

Figure 1. Daily COVID-19 cases referred to the designated hospital for children aged <18 years from March 1 to March 31, 2022

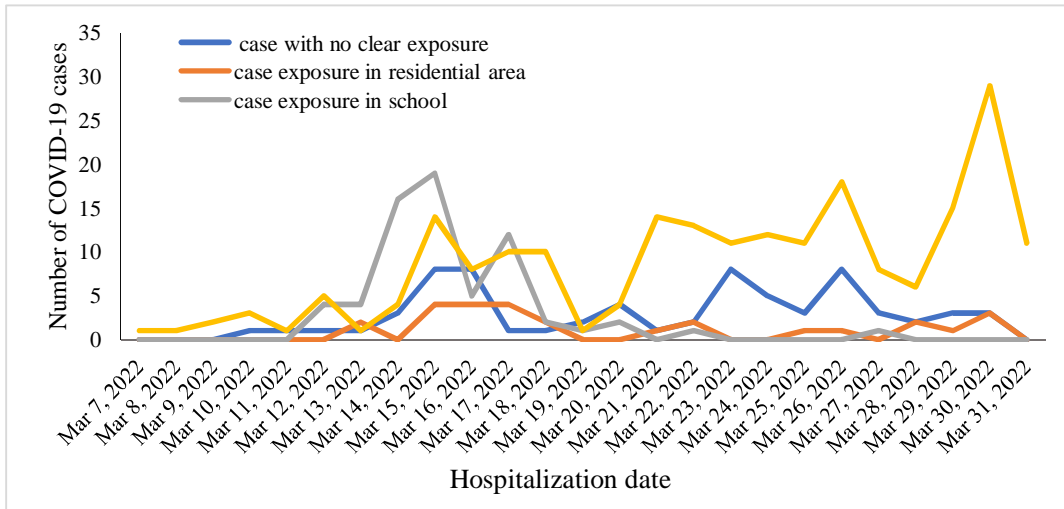

Figure 2. Model of epidemiological exposure over time among pediatric COVID-19 cases
